# Supplementary material for: Phytosynthetic Ag doped ZnO nanoparticles: Semiconducting green remediators
Source: publisher site journal article supplement (doi:10.1515/chem-2018-0060), 2018-06-14
Supplement: Supplementary file 1 [file chem-2018-0060_sm.pdf]

## Supplementary Information

## Open Access

Khuram Shahzad Ahmad\*, Shaan Bibi Jaffri

# Phytosynthetic Ag doped ZnO nanoparticles: Semiconducting green remediators

Photocatalytic and antimicrobial potential of green nanoparticles

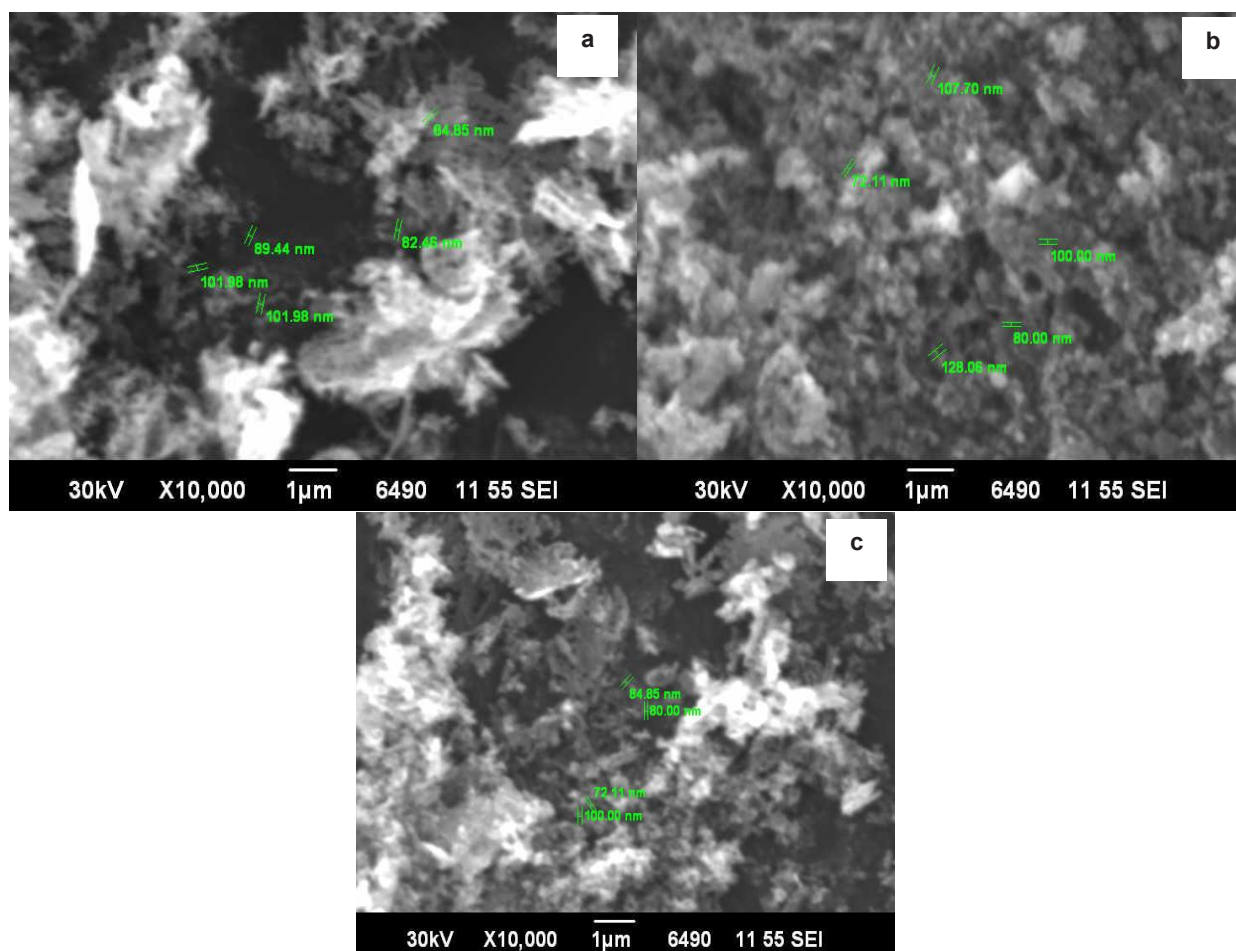

**Figure S1:** SEM micrographs of biogenic silver doped ZnO nanoparticles (BSDZNPs) (a) 1.6% dopant (b) 1.8% dopant (c) 2.0% dopant.
